# Supplementary material
Source: Springer Nature journal article supplement (https://www.springermedizin.de/resource/supplementary/12901_2012_81_MOESM2_ESM.pdf/9515198)
Supplement: MOESM2 [file 9515198]

Assess for eligibility- patients with a diagnosis of uncompensated unilateral peripheral vestibular disease

Consent and baseline assessment

Random allocation (concealed and blocked)

Exclusion Criteria

- Central Nervous System Disease
- Active BPPV
- Fluctuating Disease (Migraine, Meniere's)
- Unwilling or unable to use a Nintendo Wii (epilepsy, pacemaker)

6 Week Nintendo Wii Fit Plus® based vestibular rehabilitation (6 treatments and daily home exercise program)

6 Week conventional vestibular rehabilitation (6 treatments and daily home exercise program)

8 Week Follow Up (primary endpoint)

6 Month Follow Up (secondary endpoint)
